# Supplementary material for: Synthesis and application of benzooxadiazole-based conjugated polymers in high performance phototransistors
Source: Royal Society of Chemistry journal article supplement (doi:10.1039/c5tc02369f), 2015-01-01
Supplement: c5tc02369f1.pdf [file c5tc02369f1.pdf]

# Synthesis and Application of Benzooxadiazole Based Conjugated Polymers in High Performance Phototransistors

Chong Kang,<sup>a</sup> Jicheng Zhang,<sup>a</sup> Huanli Dong,<sup>b</sup> Wenping Hu<sup>\*b</sup> and Zhishan Bo<sup>\*a</sup>

<sup>a</sup> Beijing Key Laboratory of Energy Conversion and Storage Materials, College of Chemistry, Beijing Normal University, Beijing 100875, China. E-mail: zsho@bnu.edu.cn; Tel: +86-10-62206891

<sup>b</sup>Key Laboratory of Organic Solids, Institute of Chemistry, Chinese Academy of Sciences, Beijing 100190, P. R. China. E-mail: huwp@iccas.ac.cn; Tel: +86-10-82615030.

## Synthesis of polymers

A mixture of dibromo monomer (0.30 mmol), compound **1** (0.30 mmol), NaHCO<sub>3</sub> (1.11 g, 8 mmol), THF (20 mL), toluene (6 mL) and H<sub>2</sub>O (2 mL) was carefully degassed before and after Pd(PPh<sub>3</sub>)<sub>4</sub> (6.00 mg, 5.18 μmol) was added. The mixture was heated at reflux and stirred for 3d under N<sub>2</sub> atmosphere. Phenyl boric acid (10 mg) and bromobenzene (0.2 mL) were added successively at a time interval of 5 h to end-cap the bromo and boronic acid endgroups, respectively. After cooled down to room temperature, chloroform (100 mL) were added, the organic layer was washed with water (40 mL×3) and evaporated the solvent, the residue was poured into a large amount of acetone, and the resulting precipitates were collected by filtration and washed with acetone. The crude product was dissolved in a large amount of hot chlorobenzene and filtrated. After the removal of most of the solvent, the resulted concentrated solution was precipitated into a large amount of acetone. The precipitates were collected by filtration and dried under vacuum.

### CZ-BO8:

<sup>1</sup>H NMR (400 MHz, 1,2-dichlorobenzene-d<sub>4</sub>): δ (ppm) 9.19 (m, 2H), 8.43-8.45 (m, 2H), 8.22 (m, 2H), 8.10 (m, 2H), 8.04-8.08 (m, 2H), 4.65 (m, 6H), 1.18-1.71 (m, 62H).

GPC (PS standards):  $M_w = 44.0 \text{ kg mol}^{-1}$ ,  $M_n = 13.4 \text{ kg mol}^{-1}$  and PDI = 3.28.

### CZ-BO12:

$^1\text{H}$  NMR (400 MHz, 1,2-dichlorobenzene- $d_4$ ):  $\delta$  (ppm) 8.64 (m, 2H), 7.89-7.91 (m, 2H), 7.68 (m, 2H), 7.54-7.55 (m, 2H), 7.53 (m, 2H), 4.10 (m, 6H), 0.65-1.04 (m, 78H).

GPC (PS standards):  $M_w = 65.7 \text{ kg mol}^{-1}$ ,  $M_n = 18.9 \text{ kg mol}^{-1}$  and PDI = 3.48.

### CZ-BT8:

$^1\text{H}$  NMR (400 MHz, 1,2-dichlorobenzene- $d_4$ ):  $\delta$  (ppm) 8.93 (m, 2H), 8.17-8.18 (m, 2H), 7.92 (m, 2H), 7.82 (m, 2H), 7.77 (m, 2H), 4.39 (m, 6H), 0.95-2.27 (m, 62H).

GPC (PS standards):  $M_w = 47.7 \text{ kg mol}^{-1}$ ,  $M_n = 17.7 \text{ kg mol}^{-1}$  and PDI = 2.69.

### CZ-BT12:

$^1\text{H}$  NMR (400 MHz, 1,2-dichlorobenzene- $d_4$ ):  $\delta$  (ppm) 8.67 (m, 2H), 7.93 (m, 2H), 7.70 (m, 2H), 7.57 (m, 2H), 7.52 (m, 2H), 4.16 (m, 6H), 0.70-2.10 (m, 78H).

GPC (PS standards):  $M_w = 56.3 \text{ kg mol}^{-1}$ ,  $M_n = 19.6 \text{ kg mol}^{-1}$  and PDI = 2.87.

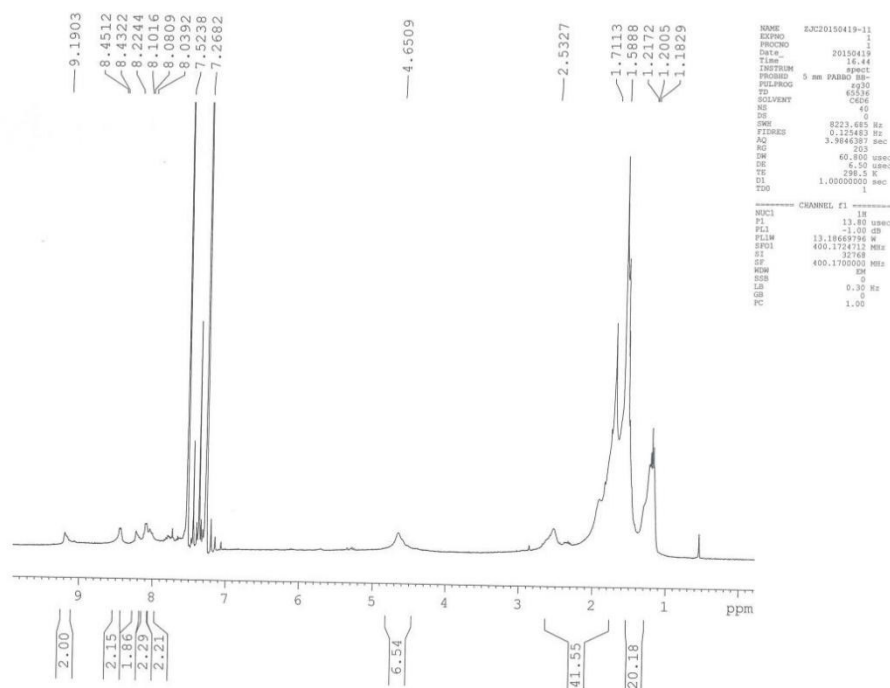

Fig. S1  $^1\text{H}$  NMR spectrum of CZ-BO8 (measured in 1,2-dichlorobenzene- $d_4$ )

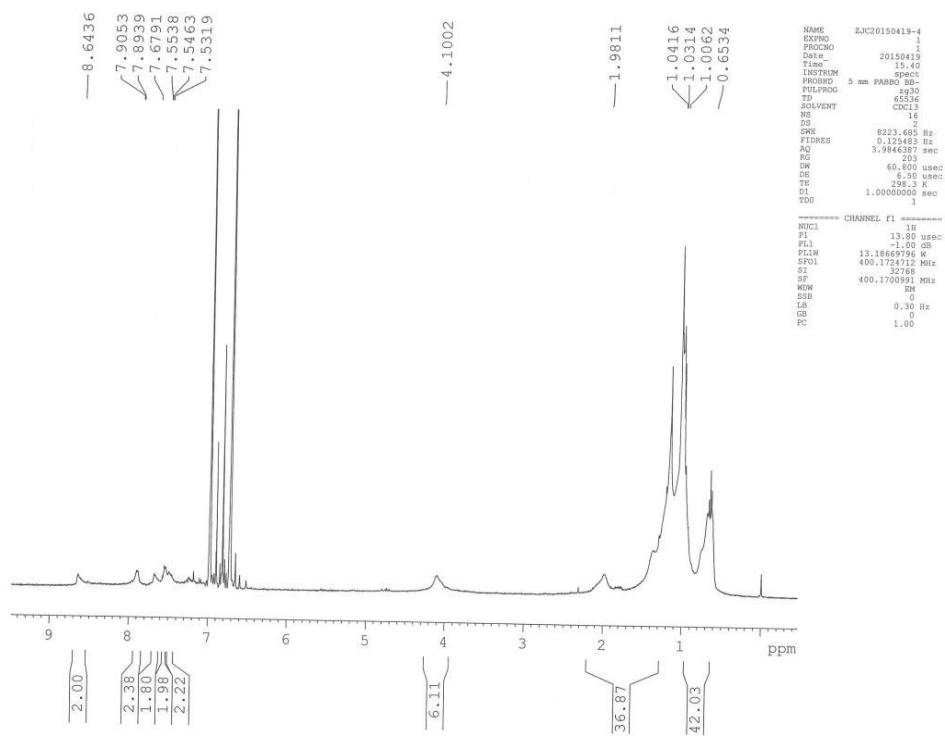

Fig. S2  $^1\text{H}$  NMR spectrum of CZ-BO12 (measured in 1,2-dichlorobenzene- $d_4$ ).

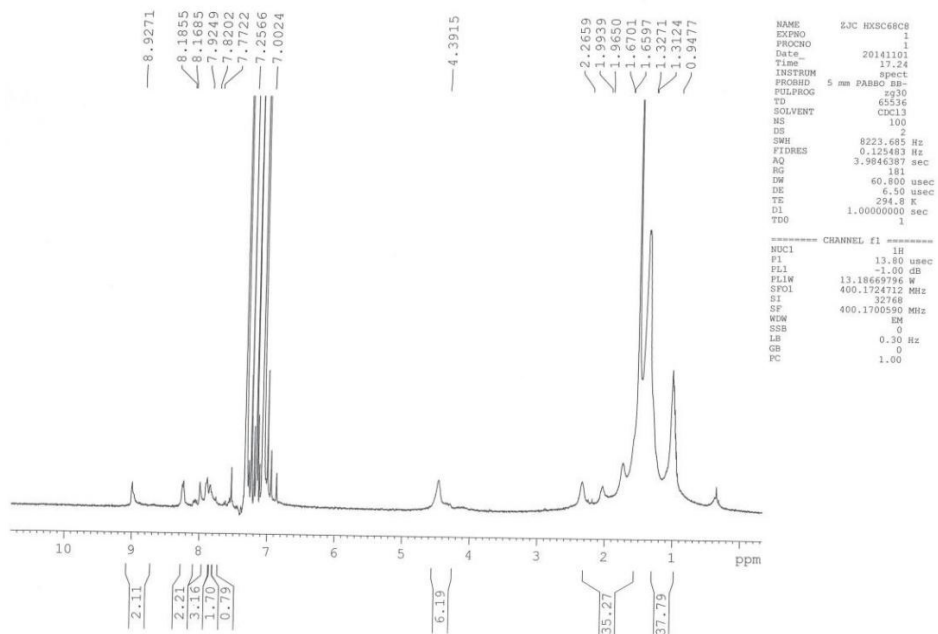

Fig. S3  $^1\text{H}$  NMR spectrum of CZ-BT8 (measured in 1,2-dichlorobenzene- $d_4$ )

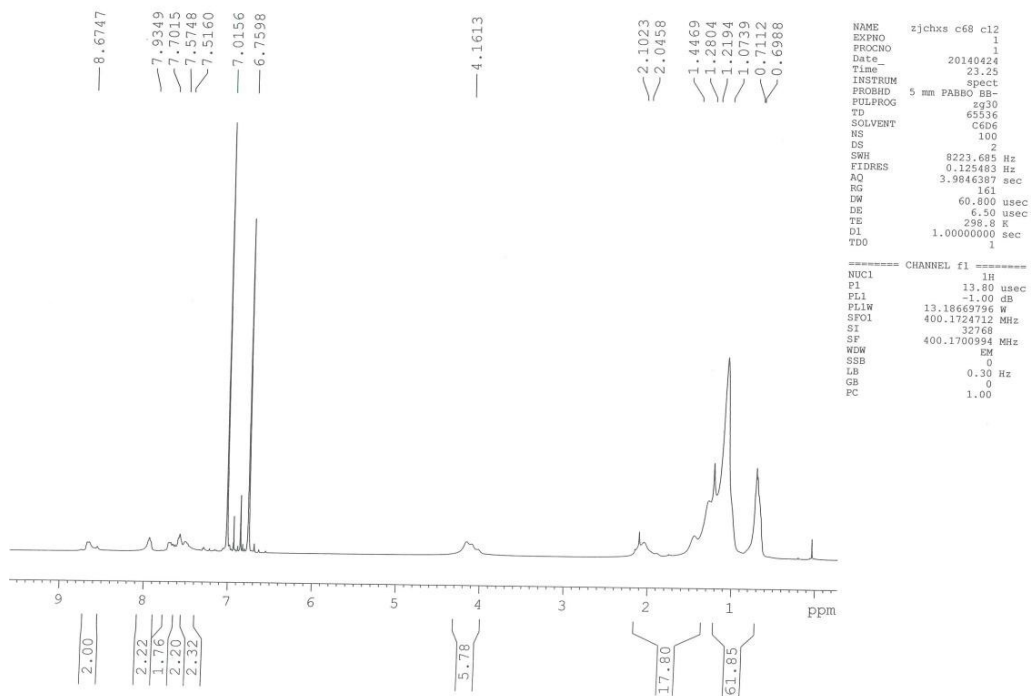

**Fig. S4**  $^1\text{H}$  NMR spectrum of **CZ-BT12** (measured in 1,2-dichlorobenzene- $d_4$ )
